# Supplementary material for: Mediators of Lifestyle Behaviour Changes in Obese Pregnant Women. Secondary Analyses from the DALI Lifestyle Randomised Controlled Trial
Source: MDPI journal article supplement (doi:10.3390/nu11020311), 2019-02-01
Supplement: s2 [file s2]

**Table S1. List of statements for assessing outcome expectancy, task self-efficacy and perceived social support.**

|                                                                         |                                                                                                                                                                                                                                                                          |
|-------------------------------------------------------------------------|--------------------------------------------------------------------------------------------------------------------------------------------------------------------------------------------------------------------------------------------------------------------------|
| A. Attitude weight:                                                     | <ul style="list-style-type: none"> <li>• I am bothered with <u>my current weight</u></li> <li>• It is important for me to manage my <u>weight</u></li> </ul>                                                                                                             |
| B. Outcome expectancy weight management for reducing GDM risk:          | <ul style="list-style-type: none"> <li>• Managing my <u>weight</u> during this pregnancy, will help me to reduce <i>my risk of developing GDM</i></li> </ul>                                                                                                             |
| C. Outcome expectancy physical activity for reducing GDM risk:          | <ul style="list-style-type: none"> <li>• Staying <u>physically active</u> during this pregnancy, will help me to reduce <i>my risk of developing GDM</i></li> </ul>                                                                                                      |
| D. Outcome expectancy healthy eating for reducing GDM risk:             | <ul style="list-style-type: none"> <li>• <u>Eating healthily</u> during this pregnancy, will help me to reduce <i>my risk of developing GDM</i></li> </ul>                                                                                                               |
| E. Outcome expectancy weight management for reducing risk for the baby: | <ul style="list-style-type: none"> <li>• <u>Managing my weight</u> during this pregnancy, will help to reduce <i>health risks for my baby</i></li> </ul>                                                                                                                 |
| F. Outcome expectancy physical activity for reducing risk for the baby: | <ul style="list-style-type: none"> <li>• <u>Staying physically active</u> during this pregnancy, will help to reduce <i>health risks for my baby</i></li> </ul>                                                                                                          |
| G. Outcome expectancy healthy eating for reducing risk for the baby:    | <ul style="list-style-type: none"> <li>• <u>Eating healthily</u> during this pregnancy, will help to reduce <i>health risks for my baby</i></li> </ul>                                                                                                                   |
| H. Task self-efficacy weight:                                           | <ul style="list-style-type: none"> <li>• I am confident that I will succeed in <u>managing my weight</u></li> </ul>                                                                                                                                                      |
| I. Task self-efficacy healthy eating:                                   | <ul style="list-style-type: none"> <li>• I am confident that I will succeed in <u>eating healthily</u> on a daily basis <u>right now</u></li> <li>• I am confident that I will succeed in <u>eating healthily</u> on a daily basis <u>in the coming weeks</u></li> </ul> |
| J. Task self-efficacy physical activity:                                | <ul style="list-style-type: none"> <li>• I am confident that I can be <u>physically active</u> on a daily basis <u>right now</u></li> <li>• I am confident that I can be <u>physically active</u> on a daily basis as planned <u>in the coming weeks</u></li> </ul>      |
| K. Satisfaction with social support for physical activity:              | <ul style="list-style-type: none"> <li>• I am satisfied with the level of support I am receiving <u>for being physically active</u> from my partner, family and friends</li> </ul>                                                                                       |
| L. Satisfaction with social support for healthy eating:                 | <ul style="list-style-type: none"> <li>• I am satisfied with the level of support I am receiving <u>for eating healthily</u> from my partner, family and friends</li> </ul>                                                                                              |

B&C and E&F were combined for outcome expectancy in relation to moderate-to-vigorous physical activity (MVPA) and sedentary behaviour, B&D and E&G were combined for outcome expectancy in relation to dietary outcomes. H&J were combined for task self-efficacy in relation to MVPA and sedentary behaviour, H&I were combined for task self-efficacy in relation to dietary outcomes.

**Table S2a. Moderate to vigorous physical activity at 24-28 weeks and 35-37 weeks, mediators at 24-28 weeks.**

|                                        | Effect of mediator on<br>MVPA (b-path) | Indirect effect (path a*b) |                          |                          |
|----------------------------------------|----------------------------------------|----------------------------|--------------------------|--------------------------|
|                                        |                                        | HE&PA                      | HE                       | PA                       |
| <b>MVPA at 24-28 weeks (n = 382)</b>   | <b>Estimate (95% CI)</b>               | <b>Estimate (95% CI)</b>   | <b>Estimate (95% CI)</b> | <b>Estimate (95% CI)</b> |
| Outcome expectancy GDM risk reduction  | -0.001 (-0.05; 0.05)                   | -0.002 (-0.09; 0.08)       | -0.001 (-0.09; 0.08)     | -0.002 (-0.09; 0.09)     |
| Outcome expectancy risk reduction baby | -0.007 (-0.06; 0.05)                   | -0.01 (-0.09; 0.05)        | -0.01 (-0.09; 0.06)      | -0.01 (-0.09; 0.06)      |
| Task self-efficacy                     | <b>0.04 (0.02; 0.07)</b>               | <b>0.09 (0.03; 0.19)</b>   | 0.04 (-0.07; 0.12)       | <b>0.08 (0.02; 0.18)</b> |
| Satisfaction with social support       | -0.01 (-0.07; 0.04)                    | -0.01 (-0.05; 0.03)        | -0.005 (-0.05; 0.02)     | -0.01 (-0.05; 0.02)      |
| Perceived risk for GDM                 | -0.05 (-0.17; 0.06)                    | -0.001 (-0.03; 0.01)       | 0.003 (-0.02; 0.02)      | -0.002 (-0.02; 0.02)     |
| <b>MVPA at 35-37 weeks (n = 332)</b>   | <b>Estimate (95% CI)</b>               | <b>Estimate (95% CI)</b>   | <b>Estimate (95% CI)</b> | <b>Estimate (95% CI)</b> |
| Outcome expectancy GDM risk reduction  | -0.01 (-0.08; 0.07)                    | -0.01 (-0.15; 0.10)        | -0.01 (-0.13; 0.10)      | -0.01 (-0.16; 0.12)      |
| Outcome expectancy risk reduction baby | -0.02 (-0.09; 0.06)                    | -0.01 (-0.15; 0.05)        | -0.02 (-0.15; 0.07)      | -0.02 (-0.15; 0.08)      |
| Task self-efficacy                     | <b>0.03 (0.02; 0.06)</b>               | <b>0.06 (0.01; 0.16)</b>   | 0.03 (-0.01 0.11)        | <b>0.08 (0.01; 0.20)</b> |
| Satisfaction with social support       | 0.02 (-0.06; 0.10)                     | 0.01 (-0.02; 0.07)         | 0.01 (-0.01; 0.06)       | 0.01 (-0.01; 0.07)       |
| Perceived risk for GDM                 | 0.001 (-0.15; 0.15)                    | 0.0001 (-0.03; 0.03)       | 0.000 (-0.02; 0.02)      | 0.000 (-0.02; 0.02)      |

Abbreviations: CI= Confidence Interval; HE=Healthy Eating; PA=Physical Activity; HE&PA= Healthy Eating & Physical Activity; GDM=gestational diabetes; MVPA=moderate-to-vigorous physical activity.

**Table 2Sb. Sedentary behaviour at 24-28 weeks and 35-37 weeks, mediators at 24-28 weeks.**

|                                                            | Effect of mediator on sedentary behaviour (b-path) | Indirect effect (path a*b) |                          |                          |
|------------------------------------------------------------|----------------------------------------------------|----------------------------|--------------------------|--------------------------|
|                                                            |                                                    | HE&PA                      | HE                       | PA                       |
| <b>Sedentary behaviour at 24-28 weeks (<i>n</i> = 387)</b> | <b>Estimate (95% CI)</b>                           | <b>Estimate (95% CI)</b>   | <b>Estimate (95% CI)</b> | <b>Estimate (95% CI)</b> |
| Outcome expectancy GDM risk reduction                      | -0.16 (-0.59; 0.26)                                | -0.21 (-1.04; 0.27)        | -0.20 (-0.93; 0.27)      | -0.22 (-1.01; 0.30)      |
| Outcome expectancy risk reduction baby                     | 0.21 (-0.24; 0.65)                                 | 0.17 (-0.12; 0.96)         | 0.19 (-0.14; 0.89)       | 0.20 (-0.15; 0.86)       |
| Task self-efficacy                                         | -0.18 (-0.37; 0.01)                                | -0.37 (-1.11; 0.03)        | -0.19 (-0.78; 0.03)      | -0.33 (-1.05; 0.02)      |
| Satisfaction with social support                           | -0.18 (-0.65; 0.29)                                | -0.10 (-0.60; 0.19)        | -0.07 (-0.52; 0.12)      | -0.09 (-0.54; 0.15)      |
| Perceived risk for GDM                                     | 0.36 (-0.56; 1.28)                                 | 0.01 (-0.07; 0.26)         | 0.001 (-0.13; 0.18)      | -0.004 (-0.19; 0.10)     |
| <b>Sedentary behaviour at 35-37 weeks (<i>n</i> = 336)</b> | <b>Estimate (95% CI)</b>                           | <b>Estimate (95% CI)</b>   | <b>Estimate (95% CI)</b> | <b>Estimate (95% CI)</b> |
| Outcome expectancy GDM risk reduction                      | 0.02 (-0.53; 0.57)                                 | 0.03 (-0.78; 0.82)         | 0.02 (-0.76; 0.70)       | 0.03 (-0.89; 0.83)       |
| Outcome expectancy risk reduction baby                     | 0.001 (-0.55; 0.55)                                | 0.001 (-0.54; 0.62)        | 0.002 (-0.65; 0.68)      | 0.002 (-0.67; 0.68)      |
| Task self-efficacy                                         | -0.14 (-0.36; 0.09)                                | -0.25 (-0.80; 0.11)        | -0.13 (-0.62; 0.07)      | -0.31 (-1.03; 0.14)      |
| Satisfaction with social support                           | -0.02 (-0.60; 0.57)                                | -0.01 (-0.44; 0.35)        | -0.01 (-0.31; 0.23)      | -0.01 (-0.34; 0.25)      |
| Perceived risk for GDM                                     | 0.14 (-0.95; 1.23)                                 | 0.01 (-0.09; 0.30)         | 0.003 (-0.12; 0.19)      | -0.003 (-0.19; 0.12)     |

Abbreviations: CI= Confidence Interval; HE=Healthy Eating; PA=Physical Activity; HE&PA= Healthy Eating & Physical Activity; GDM=gestational diabetes;

**Table S2c. Sugared drink consumption at 24-28 weeks and 35-37 weeks, mediators at 24-28 weeks.**

|                                                               | Effect of mediator on sugared drink consumption (b-path) | Indirect effect (path a*b)  |                             |                          |
|---------------------------------------------------------------|----------------------------------------------------------|-----------------------------|-----------------------------|--------------------------|
|                                                               |                                                          | HE&PA                       | HE                          | PA                       |
| <b>Sugared drink consumption at 24-28 weeks<br/>(n = 354)</b> | <b>Estimate (95% CI)</b>                                 | <b>Estimate (95% CI)</b>    | <b>Estimate (95% CI)</b>    | <b>Estimate (95% CI)</b> |
| Outcome expectancy GDM risk reduction                         | -0.25 (-0.66; 0.17)                                      | -0.31 (-1.10; 0.25)         | -0.31 (-1.05; 0.25)         | -0.27 (-0.99; 0.18)      |
| Outcome expectancy risk reduction baby                        | 0.40 (-0.04; 0.85)                                       | <b>0.38 (0.02; 1.13)</b>    | <b>0.38 (0.01; 1.21)</b>    | <b>0.43 (0.02; 1.32)</b> |
| Task self-efficacy                                            | <b>-0.24 (-0.42; -0.06)</b>                              | <b>-0.56 (-1.43; -0.07)</b> | <b>-0.48 (-1.27; -0.06)</b> | -0.13 (-0.69; 0.11)      |
| Satisfaction with social support                              | -0.11 (-0.57; 0.36)                                      | -0.02 (-0.31; 0.07)         | -0.04 (-0.34; 0.11)         | -0.01 (-0.23; 0.07)      |
| Perceived risk for GDM                                        | -0.32 (-1.11; 0.46)                                      | -0.01 (-0.23; 0.07)         | -0.005 (-0.17; 0.10)        | -0.004 (-0.16; 0.09)     |
| <b>Sugared drink consumption at 35-37 weeks<br/>(n = 295)</b> | <b>Estimate (95% CI)</b>                                 | <b>Estimate (95% CI)</b>    | <b>Estimate (95% CI)</b>    | <b>Estimate (95% CI)</b> |
| Outcome expectancy GDM risk reduction                         | 0.05 (-0.63; 0.74)                                       | 0.08 (-0.86; 1.31)          | 0.07 (-0.69; 1.19)          | 0.08 (-0.78; 1.28)       |
| Outcome expectancy risk reduction baby                        | 0.05 (-0.66; 0.76)                                       | 0.06 (-0.79; 1.09)          | 0.06 (-0.76; 1.07)          | 0.07 (-0.86; 1.21)       |
| Task self-efficacy                                            | -0.24 (-0.51; 0.04)                                      | -0.63 (-1.90; 0.20)         | -0.54(-1.75; 0.15)          | -0.29(-1.29; 0.07)       |
| Satisfaction with social support                              | -0.17 (-0.93; 0.58)                                      | -0.06 (-0.58; 0.14)         | -0.08(-0.64; 0.24)          | -0.02 (-0.43; 0.10)      |
| Perceived risk for GDM                                        | -0.58 (-1.79; 0.63)                                      | -0.05 (-0.59; 0.07)         | -0.03 (-0.50; 0.09)         | -0.004 (-0.31; 0.19)     |

Abbreviations: CI= Confidence Interval; HE=Healthy Eating; PA=Physical Activity; HE&PA= Healthy Eating & Physical Activity; GDM=gestational diabetes; MVPA=moderate-to-vigorous physical activity.

**Table S2d. Vegetable consumption at 24-28 weeks and 35-37 weeks, mediators at 24-28 weeks.**

|                                                       | Effect of mediator on vegetable consumption (b-path) | Indirect effect (path a*b) |                          |                          |
|-------------------------------------------------------|------------------------------------------------------|----------------------------|--------------------------|--------------------------|
|                                                       |                                                      | HE&PA                      | HE                       | PA                       |
| <b>Vegetable consumption at 24-28 weeks (n = 357)</b> | <b>Estimate (95% CI)</b>                             | <b>Estimate (95% CI)</b>   | <b>Estimate (95% CI)</b> | <b>Estimate (95% CI)</b> |
| Outcome expectancy GDM risk reduction                 | 0.42 (-0.11; 0.95)                                   | 0.53 (-0.04; 1.42)         | 0.52 (-0.04; 1.44)       | 0.47 (-0.02; 1.38)       |
| Outcome expectancy risk reduction baby                | -0.22 (-0.79; 0.35)                                  | -0.20 (-0.96; 0.23)        | -0.20 (-0.04; 1.44)      | -0.21 (-0.94; 0.27)      |
| Task self-efficacy                                    | 0.15 (-0.08; 0.39)                                   | 0.34 (-0.15; 1.04)         | 0.36 (-0.17; 1.07)       | 0.08 (-0.08; 0.61)       |
| Satisfaction with social support                      | -0.28 (-0.88; 0.32)                                  | -0.03 (-0.40; 0.10)        | -0.11 (-0.60; 0.08)      | -0.02 (-0.35; 0.11)      |
| Perceived risk for GDM                                | 0.73(-0.30; 1.77)                                    | 0.06 (-0.08; 0.46)         | 0.02 (-0.14; 0.37)       | -0.01 (-0.27; 0.18)      |
| <b>Vegetable consumption at 35-37 weeks (n = 303)</b> | <b>Estimate (95% CI)</b>                             | <b>Estimate (95% CI)</b>   | <b>Estimate (95% CI)</b> | <b>Estimate (95% CI)</b> |
| Outcome expectancy GDM risk reduction                 | -0.21 (-0.95; 0.52)                                  | -0.36 (-1.85; 0.66)        | -0.30 (-1.68; 0.56)      | -0.31 (-1.60; 0.56)      |
| Outcome expectancy risk reduction baby                | 0.47 (-0.32; 1.25)                                   | 0.57 (-0.18; 1.98)         | 0.52 (-0.18; 1.91)       | 0.56 (-0.17; 1.94)       |
| Task self-efficacy                                    | 0.01 (-0.30; 0.32)                                   | 0.03 (-0.85; 0.81)         | 0.03 (-0.84 0.79)        | 0.01 (-0.32; 0.47)       |
| Satisfaction with social support                      | -0.03 (-0.88; 0.83)                                  | -0.004 (-0.36; 0.26)       | -0.01 (-0.50; 0.45)      | 0.001 (-0.22; 0.27)      |
| Perceived risk for GDM                                | 0.03 (-1.33; 1.39)                                   | 0.004 (-0.24; 0.29)        | 0.002 (-0.18; 0.36)      | 0.000 (-0.18; 0.19)      |

Abbreviations: CI= Confidence Interval; HE=Healthy Eating; PA=Physical Activity; HE&PA= Healthy Eating & Physical Activity; GDM=gestational diabetes; MVPA=moderate-to-vigorous physical activity.

**Table S2e. Carbohydrate consumption at 24-28 weeks and 35-37 weeks, mediators at 24-28 weeks.**

|                                                          | Effect of mediator on carbohydrate consumption (b-path) | Indirect effect (path a*b) |                          |                          |
|----------------------------------------------------------|---------------------------------------------------------|----------------------------|--------------------------|--------------------------|
|                                                          |                                                         | HE&PA                      | HE                       | PA                       |
| <b>Carbohydrate consumption at 24-28 weeks (n = 328)</b> | <b>Estimate (95% CI)</b>                                | <b>Estimate (95% CI)</b>   | <b>Estimate (95% CI)</b> | <b>Estimate (95% CI)</b> |
| Outcome expectancy GDM risk reduction                    | -0.03 (-1.09; 1.02)                                     | -0.05 (-1.97; 1.76)        | -0.05 (-1.90; 1.63)      | -0.03 (-1.30; 1.12)      |
| Outcome expectancy risk reduction baby                   | 0.16 (-0.99; 1.32)                                      | 0.16 (-1.00; 1.63)         | 0.17 (-1.04; 1.72)       | 0.12 (-0.69; 1.42)       |
| Task self-efficacy                                       | -0.19 (-0.66; 0.27)                                     | -0.43 (-1.83; 0.69)        | -0.45 (-1.87; 0.70)      | -0.05 (-0.84; 0.24)      |
| Satisfaction with social support                         | -0.20 (-1.41; 1.01)                                     | -0.05 (-0.77; 0.22)        | -0.08 (-0.82; 0.38)      | 0.004 (-0.30; 0.36)      |
| Perceived risk for GDM                                   | -1.41 (-3.39; 0.56)                                     | -0.11 (-0.88; 0.17)        | -0.03 (-0.61; 0.32)      | -0.05 (-0.62; 0.27)      |
| <b>Carbohydrate consumption at 35-37 weeks (n = 270)</b> | <b>Estimate (95% CI)</b>                                | <b>Estimate (95% CI)</b>   | <b>Estimate (95% CI)</b> | <b>Estimate (95% CI)</b> |
| Outcome expectancy GDM risk reduction                    | 0.04 (-1.91; 1.99)                                      | 0.07 (-2.96; 2.98)         | 0.06 (-2.41; 2.53)       | 0.05 (-2.20; 2.22)       |
| Outcome expectancy risk reduction baby                   | 0.47 (-1.59; 2.54)                                      | 0.62 (-1.20; 3.57)         | 0.57 (-1.15; 3.50)       | 0.48 (-0.91; 2.97)       |
| Task self-efficacy                                       | -0.17 (-0.95; 0.61)                                     | -0.43 (-2.56; 1.44)        | -0.43 (-2.56 1.50)       | -0.13 (-1.39; 0.39)      |
| Satisfaction with social support                         | -0.65 (-2.89; 1.60)                                     | -0.26 (-2.05; 0.49)        | -0.37 (-2.31; 0.79)      | -0.02 (-0.98; 0.51)      |
| Perceived risk for GDM                                   | -2.02 (-5.47; 1.44)                                     | -0.19 (-1.70; 0.23)        | -0.20 (-1.66; 0.21)      | -0.01 (-0.88; 0.65)      |

Abbreviations: CI= Confidence Interval; HE=Healthy Eating; PA=Physical Activity; HE&PA= Healthy Eating & Physical Activity; GDM=gestational diabetes; MVPA=moderate-to-vigorous physical activity.

**Table S2f. Portion size at 24-28 weeks and 35-37 weeks, mediators at 24-28 weeks.**

| Portion size at 24-28 weeks ( <i>n</i> = 346) | Effect of mediator on<br>portion size (b-path) | Indirect effect (path a × b) |                             |                          |
|-----------------------------------------------|------------------------------------------------|------------------------------|-----------------------------|--------------------------|
|                                               | Estimate (95% CI)                              | HE&PA                        | HE                          | PA                       |
|                                               |                                                | Estimate (95% CI)            | Estimate (95% CI)           | Estimate (95% CI)        |
| Outcome expectancy GDM risk reduction         | -0.66 (-1.54; 0.21)                            | -0.83 (-2.62; 0.17)          | -0.87 (-2.70; 0.17)         | -0.64 (-2.23; 0.10)      |
| Outcome expectancy risk reduction baby        | 0.90 (-0.05; 1.86)                             | <b>0.80 (0.05; 2.47)</b>     | <b>0.97 (0.07; 2.73)</b>    | <b>0.84 (0.05; 2.53)</b> |
| Task self-efficacy                            | -0.26 (-0.66; 0.14)                            | -0.62 (-1.97; 0.40)          | -0.63 (-1.96; 0.42)         | -0.16 (-1.06; 0.14)      |
| Satisfaction with social support              | -0.67 (-1.66; 0.33)                            | -0.14 (-1.14; 0.13)          | -0.27 (-1.35; 0.11)         | -0.03 (-0.71; 0.26)      |
| Perceived risk for GDM                        | -0.01 (-1.72; 1.70)                            | -0.004 (-0.22; 0.21)         | -0.004 (-0.22; 0.19)        | -0.0002 (-0.21; 0.19)    |
| Portion size at 35-37 weeks ( <i>n</i> =293)  | Estimate (95% CI)                              | HE&PA                        | HE                          | PA                       |
|                                               |                                                | Estimate (95% CI)            | Estimate (95% CI)           | Estimate (95% CI)        |
|                                               |                                                | Estimate (95% CI)            | Estimate (95% CI)           | Estimate (95% CI)        |
| Outcome expectancy GDM risk reduction         | -0.20 (-1.20; 0.81)                            | -0.31 (-2.11; 1.22)          | -0.29 (-1.97; 1.18)         | -0.24 (-1.75; 0.94)      |
| Outcome expectancy risk reduction baby        | 0.37 (-0.70; 1.45)                             | 0.41 (-0.66; 2.32)           | 0.47 (-0.80; 2.46)          | 0.42 (-0.68; 2.23)       |
| Task self-efficacy                            | -0.39 (-0.81; 0.04)                            | -1.01 (-2.72; 0.09)          | -1.00 (-2.71 0.10)          | -0.41 (-1.62; 0.09)      |
| Satisfaction with social support              | <b>-1.15 (-2.30; -0.01)</b>                    | -0.35 (-1.46; 0.11)          | <b>-0.61 (-1.93; -0.03)</b> | -0.10 (-0.98; 0.40)      |
| Perceived risk for GDM                        | -0.15 (-2.02; 1.72)                            | -0.01 (-0.48; 0.20)          | -0.02 (-0.47; 0.21)         | 0.002 (-0.21; 0.29)      |

Abbreviations: CI= Confidence Interval; HE=Healthy Eating; PA=Physical Activity; HE&PA= Healthy Eating & Physical Activity; GDM=gestational diabetes; MVPA=moderate-to-vigorous physical activity.

**Table S3. Total (c-path) and direct (c'-path) intervention effects on lifestyle behaviours\*.**

| <b>Total effect</b>             | <b>HE&amp;PA vs UC</b>      | <b>HE vs UC</b>             | <b>PA vs UC</b>             |
|---------------------------------|-----------------------------|-----------------------------|-----------------------------|
| <b>24-28 weeks</b>              | <b>Beta (95% CI)</b>        | <b>Beta (95% CI)</b>        | <b>Beta (95% CI)</b>        |
| MVPA, MET-h/week**              | <b>0.27 (0.02, 0.52)</b>    | 0.05 (-0.20, 0.29)          | <b>0.35 (0.10, 0.60)</b>    |
| Sedentary behaviour, MET-h/week | <b>-2.46 (-4.51, -0.40)</b> | <b>-2.37 (-4.37, -0.36)</b> | <b>-2.09 (-4.13, -0.05)</b> |
| Sugary drinks, portions /week   | -1.31 (-4.22, 1.59)         | -1.67 (-3.41, 0.07)         | 1.43 (-0.36, 3.22)          |
| Vegetables, portions /week      | <b>2.49 (0.20, 4.79)</b>    | <b>3.71 (1.47, 5.94)</b>    | 0.12 (-2.16, 2.39)          |
| Carbohydrates, portions /week   | -1.78 (-6.24, 2.68)         | <b>-4.62 (-8.88, -0.35)</b> | -2.44 (-6.79, 1.91)         |
| Portion size, portions /week    | -1.25 (-5.12, 2.62)         | <b>-5.48 (-9.19, -1.76)</b> | -1.49 (-5.29, 2.31)         |
| <b>Total effect</b>             |                             |                             |                             |
| <b>35-37 weeks</b>              |                             |                             |                             |
| MVPA, MET-h/week**              | 0.06 (-0.27, 0.38)          | 0.04 (-0.28, 0.36)          | 0.26 (-0.06, 0.58)          |
| Sedentary behaviour, MET-h/week | <b>-3.49 (-5.88, -1.10)</b> | -1.12 (-3.48, 1.25)         | -1.19 (-3.55, 1.17)         |
| Sugary drinks, portions /week   | <b>-3.19 (-5.89, -0.50)</b> | -1.45 (-4.09, 1.20)         | 1.51 (-1.15, 4.18)          |
| Vegetables, portions /week      | 0.72 (-2.23, 3.68)          | <b>3.28 (0.33, 6.23)</b>    | -1.31 (-4.22, 1.59)         |
| Carbohydrates, portions /week   | -4.70 (-12.21, 2.80)        | <b>-4.94 (-12.29, 2.41)</b> | -1.15 (-8.43, 6.13)         |
| Portion size, portions /week    | -4.01 (-8.14, 0.12)         | <b>-4.03 (-8.04, -0.02)</b> | -0.04 (-4.06, 3.98)         |
| <b>Direct effect</b>            |                             |                             |                             |
| <b>24-28 weeks</b>              |                             |                             |                             |
| MVPA, MET-h/week**              | 0.20 (-0.06; 0.45)          | 0.02 (-0.23; 0.26)          | <b>0.29 (0.04; 0.54)</b>    |
| Sedentary behaviour, MET-h/wk   | -1.95 (-4.05; 0.14)         | <b>-2.09 (-4.12; -0.07)</b> | -1.64 (-3.71; 0.44)         |
| Sugary drinks, portions /week   | -1.57 (-4.56; 1.42)         | -1.23 (-2.98; 0.52)         | 1.42 (-0.37; 3.21)          |
| Vegetables, portions /week      | 1.80 (-0.55; 4.14)          | <b>3.11 (0.83; 5.39)</b>    | -0.20 (-2.48; 2.09)         |
| Carbohydrates, portions /week   | -1.30 (-5.93; 3.33)         | -4.18 (-8.59; 0.23)         | -2.44 (-6.85; 1.98)         |
| Portion size, portions /week    | -0.46 (-4.43; 3.50)         | <b>-4.68 (-8.48; -0.87)</b> | -1.50 (-5.32; 2.32)         |
| <b>Direct effect</b>            |                             |                             |                             |
| <b>35-37 weeks</b>              |                             |                             |                             |
| MVPA, MET-h/week **             | 0.01 (-0.32; 0.34)          | 0.03 (-0.29; 0.36)          | 0.20 (-0.13; 0.53)          |
| Sedentary behaviour, MET-h/week | <b>-3.27 (-5.73; -0.81)</b> | -1.01 (-3.42; 1.40)         | -0.90 (-3.34; 1.54)         |
| Sugary drinks, portions /week   | -2.60 (-5.38; 0.19)         | -0.91 (-3.61; 1.79)         | 1.69 (-1.03; 4.40)          |
| Vegetables, portions /week      | 0.49 (-2.61; 3.60)          | 3.05 (-0.01; 6.10)          | -1.57 (-4.56; 1.42)         |
| Carbohydrates, portions /week   | -4.52 (-12.41; 3.38)        | -4.57 (-12.22; 3.08)        | -1.52 (-9.00; 5.96)         |
| Portion size, portions /week    | -2.73 (-6.96; 1.48)         | -2.59 (-6.66; 1.49)         | 0.29 (-3.73; 4.31)          |

Abbreviations: CI= Confidence Interval; UC= Usual Care; HE=Healthy Eating; PA=Physical Activity; HE&PA= Healthy Eating & Physical Activity; GDM=gestational diabetes; MVPA=moderate-to-vigorous physical activity.\* The total intervention effects result from the parallel mediation analyses, therefore may differ slightly from results presented previously [9]. \*\* LN of MVPA
